# Supplementary material for: Data and outcome of inguinal hernia repair in hernia registers – a review of the literature
Source: PubMed Central journal article supplement — Innov Surg Sci. 2017 Jan 31;2(2):69–79. doi: 10.1515/iss-2016-0206 (PMC6754003; doi:10.1515/iss-2016-0206), 2017-01-31
Supplement: iss-2-20160206-s001.pdf [file iss-2-20160206-s001.pdf]

## Reviewer Assessment

## Open Access

Ferdinand Köckerling\*

# Data and outcome of inguinal hernia repair in hernia registers – a review of the literature

DOI 10.1515/iss-2016-0206

Received December 13, 2016; accepted December 29, 2016

\*Corresponding author: Ferdinand Köckerling,

Department of Surgery and Center for Minimally Invasive Surgery, Academic Teaching Hospital of Charité Medical School, Vivantes Hospital, Neue Bergstrasse 6, D-13585 Berlin, Germany, E-mail: ferdinand.koeckerling@vivantes.de

## Reviewers' Comments to Original Submission

### Reviewer 1: anonymous

Dec 14, 2016

|                                                                   |                 |
|-------------------------------------------------------------------|-----------------|
| <b>Reviewer Recommendation Term:</b>                              | Accept          |
| <b>Overall Reviewer Manuscript Rating:</b>                        | 90              |
| <b>Custom Review Questions</b>                                    | <b>Response</b> |
| Is the subject area appropriate for you?                          | 5 - High/Yes    |
| Does the title clearly reflect the paper's content?               | 5 - High/Yes    |
| Does the abstract clearly reflect the paper's content?            | 5 - High/Yes    |
| Do the keywords clearly reflect the paper's content?              | 5 - High/Yes    |
| Does the introduction present the problem clearly?                | 4               |
| Are the results/conclusions justified?                            | 5 - High/Yes    |
| How comprehensive and up-to-date is the subject matter presented? | 5 - High/Yes    |
| How adequate is the data presentation?                            | 5 - High/Yes    |
| Are units and terminology used correctly?                         | 5 - High/Yes    |
| Is the number of cases adequate?                                  | 5 - High/Yes    |
| Are the experimental methods/clinical studies adequate?           | 4               |
| Is the length appropriate in relation to the content?             | 5 - High/Yes    |
| Does the reader get new insights from the article?                | 5 - High/Yes    |
| Please rate the practical significance.                           | 5 - High/Yes    |
| Please rate the accuracy of methods.                              | 5 - High/Yes    |
| Please rate the statistical evaluation and quality control.       | 5 - High/Yes    |
| Please rate the appropriateness of the figures and tables.        | N/A             |
| Please rate the appropriateness of the references.                | 5 - High/Yes    |
| Please evaluate the writing style and use of language.            | 5 - High/Yes    |
| Please judge the overall scientific quality of the manuscript.    | 5 - High/Yes    |
| Are you willing to review the revision of this manuscript?        | Yes             |

### Comments to Authors:

This is an excellent review based on hernia registries. It can be assumed that the presented data are even more important than results from RCTs because registry data reflect the clinical routine outside of clinical trials. Surgeons involved in hernia treatment should be aware of the results of the presented registries.

**Reviewer 2: anonymous**

Dec 28, 2016

---

|                                                                   |                 |
|-------------------------------------------------------------------|-----------------|
| <b>Reviewer Recommendation Term:</b>                              | Accept          |
| <b>Overall Reviewer Manuscript Rating:</b>                        | 92              |
| <b>Custom Review Questions</b>                                    | <b>Response</b> |
| Is the subject area appropriate for you?                          | 5 - High/Yes    |
| Does the title clearly reflect the paper's content?               | 5 - High/Yes    |
| Does the abstract clearly reflect the paper's content?            | 5 - High/Yes    |
| Do the keywords clearly reflect the paper's content?              | 5 - High/Yes    |
| Does the introduction present the problem clearly?                | 5 - High/Yes    |
| Are the results/conclusions justified?                            | 4               |
| How comprehensive and up-to-date is the subject matter presented? | 5 - High/Yes    |
| How adequate is the data presentation?                            | 4               |
| Are units and terminology used correctly?                         | 5 - High/Yes    |
| Is the number of cases adequate?                                  | 5 - High/Yes    |
| Are the experimental methods/clinical studies adequate?           | 5 - High/Yes    |
| Is the length appropriate in relation to the content?             | 5 - High/Yes    |
| Does the reader get new insights from the article?                | 5 - High/Yes    |
| Please rate the practical significance.                           | 5 - High/Yes    |
| Please rate the accuracy of methods.                              | 4               |
| Please rate the statistical evaluation and quality control.       | 5 - High/Yes    |
| Please rate the appropriateness of the figures and tables.        | N/A             |
| Please rate the appropriateness of the references.                | 5 - High/Yes    |
| Please evaluate the writing style and use of language.            | 5 - High/Yes    |
| Please judge the overall scientific quality of the manuscript.    | 5 - High/Yes    |
| Are you willing to review the revision of this manuscript?        | Yes             |

**Comments to Authors:**

The author presents in this excellent review important data referring to hernia registers. Even though RCTs are indispensable for medical evidence these results from registers clearly contain a high practical relevance for surgeons dealing with hernia repair techniques.

---
